# Supplementary material for: Cucurbitacin I inhibits the proliferation of pancreatic cancer through the JAK2/STAT3 signalling pathway in vivo and in vitro
Source: PubMed Central journal article supplement (PMC9066209; doi:10.7150/jca.65875), 2022-03-28
Supplement: jcav13p2050s1.pdf [file jcav13p2050s1.pdf]

# 1 Supplementary Material

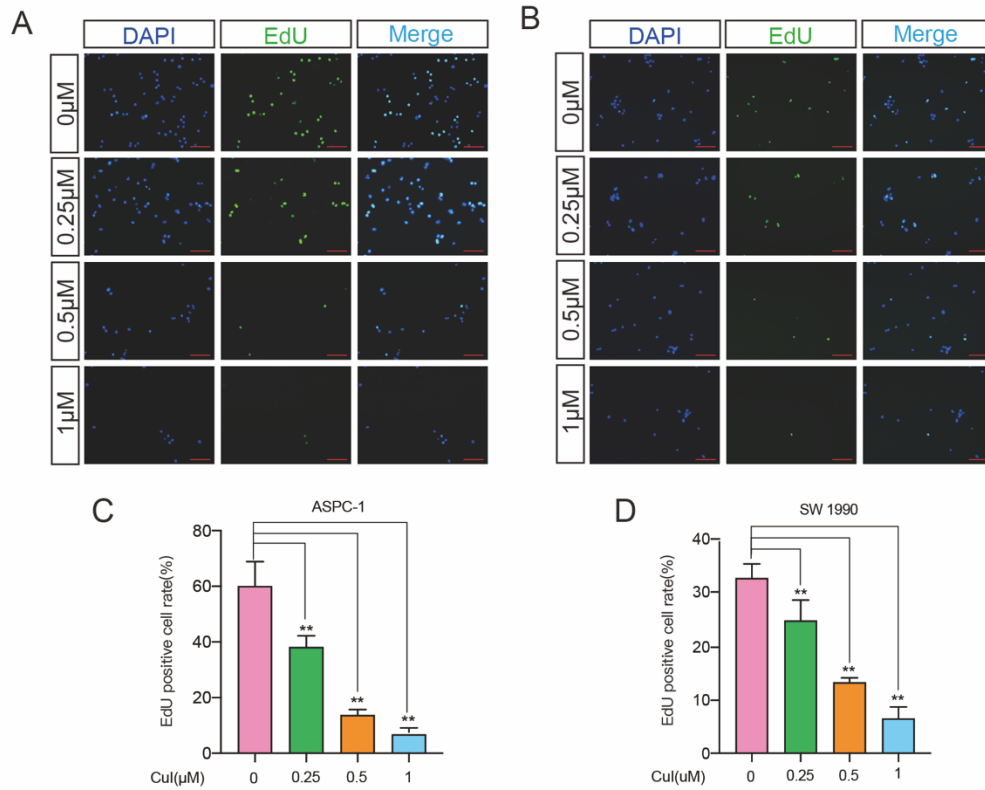

2

3 Supplementary Figure 1

4 CuI inhibited the proliferation of PDAC cells in ASPC-1 and SW 1990. (A-B) Detection by  
5 fluorescence microscopy of EdU (green) incorporated into the DNA of cultured ASPC-1 and SW  
6 1990 cells, scale bar: 200  $\mu$ m. The nuclei were counter-stained with DAPI (blue). (C-D) The EdU  
7 positive rate of ASPC-1 and SW 1990 cells.

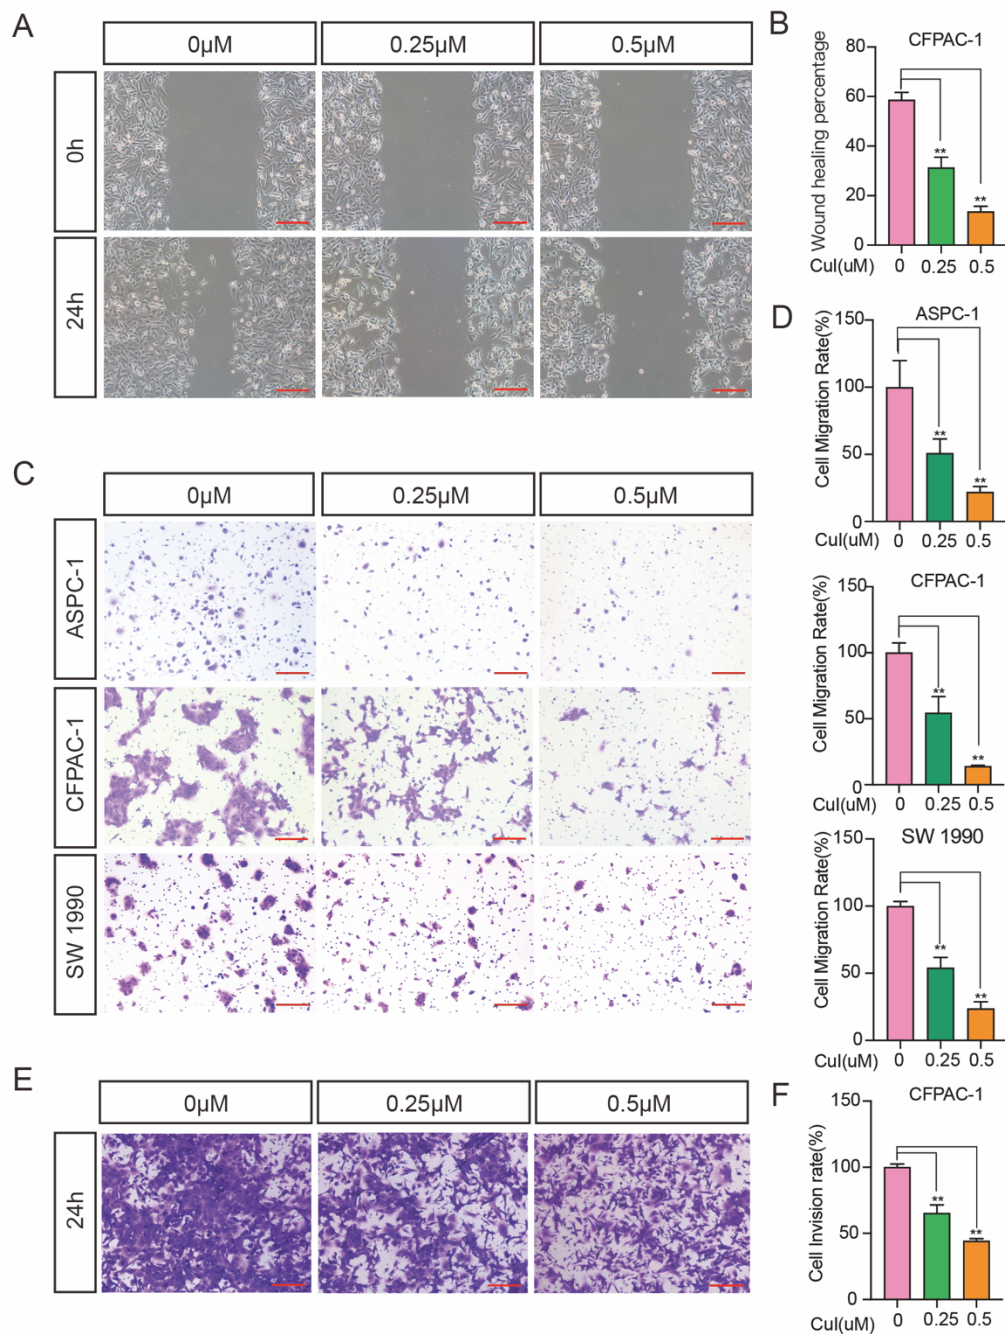

8

9 Supplementary Figure 2

10 CuI suppressed the migration and invasion of CFPAC-1 cells (A) CFPAC-1 cell migration under  
 11 different concentrations of CuI treatment, scale bar: 200  $\mu$ m. (B) Image J software was used to  
 12 measure the distance of PDAC migration. (C) Transwell assays used to assess cell 3D-migration of  
 13 ASPC-1, CFPAC-1 and SW1990, scale bar: 200  $\mu$ m. (D) The area of migrating cells is counted by  
 14 Image J software. (E) Transwell assays with matrix gel used to assess cell migration of CFPAC-1,  
 15 scale bar: 200  $\mu$ m. (F) The area of invasion cells is counted by Image J software.

16

17

18

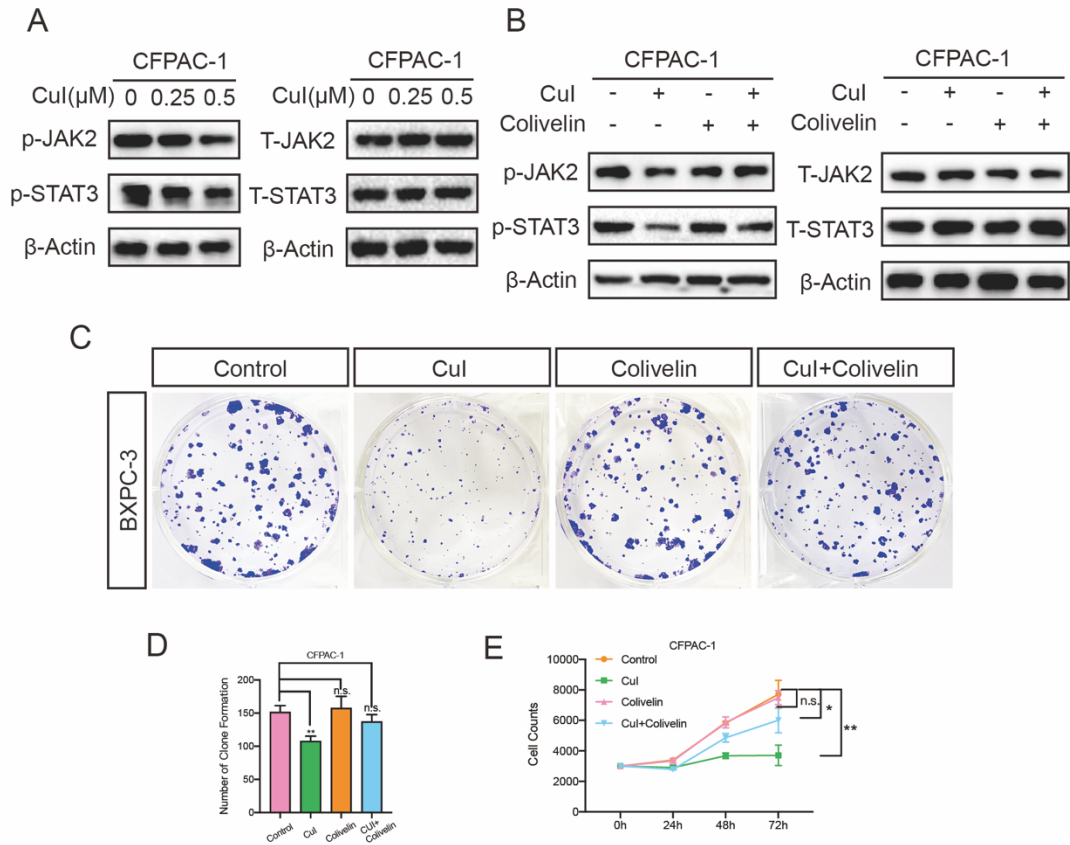

19

20 Supplementary Figure 3

21 CuI down-regulates JAK2/STAT3 signaling pathway in CFPAC-1 cells. (A) CuI induced a decrease

22 of p-JAK2 and p-STAT3 protein levels and does not influence the protein levels of T-JAK2 and T-

23 STAT3 in CuI-treated PDAC cells. (B) Colivelin activates JAK2/STAT3 signaling pathway

24 inhibited by CuI. (C-D) Colivelin significantly rescue the number of clones inhibited by CuI.

25 Colivelin significantly restores the number of cells inhibited by CuI.
